# Supplementary material for: Partial and Total Solvent-Free Limonene’s Hydrogenation: Metals, Supports, Pressure, and Water Effects
Source: Hindawi journal article supplement (doi:10.1155/2020/5946345), 2020-04-01
Supplement: f1 [file 5946345.f1.pdf]

## **Partial and Total Solvent-free Limonene's Hydrogenation: Metals, Supports, Pressure, and Water Effects**

Fanta J. Ndongou Moutombi<sup>1</sup>, Anne-Sylvie Fabiano-Tixier<sup>2</sup>, Olivier Clarisse<sup>1</sup>, Farid Chemat<sup>2</sup>, Mohamed Touaibia<sup>1\*</sup>

<sup>1</sup>Department of Chemistry and Biochemistry, Université de Moncton, Moncton, NB, Canada.

<sup>2</sup>Université d'Avignon, INRA, UMR408, GREEN Extraction Team, F-84000 Avignon, France.

\*Author to whom correspondence should be addressed;

E-mail: mohamed.touaibia@umoncton.ca

Table S1: Catalyst loadings measured by ICP/MS.

| Catalyst/support | Catalyst loading (%)                    |                                                       |
|------------------|-----------------------------------------|-------------------------------------------------------|
|                  | As specified by the commercial supplier | Analyzed after an aqua regia mineralization by ICP/MS |
| Rh/C             | 5                                       | 1.4*                                                  |
| Rh/Alumina       | 5                                       | 3.2                                                   |
| Pt/C             | 5                                       | 4.3                                                   |
| Pt/Alumina       | 5                                       | 4.5                                                   |
| Pt/Silica        | 1                                       | 0.8                                                   |
| Pd/C             | 10                                      | 9.8                                                   |
| Pd/C             | 5                                       | 5.0                                                   |
| Pd/Alumina       | 10                                      | 9.9                                                   |
| Pd/Silica        | 2.1                                     | 2.0                                                   |
| Ru/C             | 5                                       | 3.1                                                   |
| Ru/Alumina       | 5                                       | 3.8                                                   |

\*Incomplete digestion was observed for this sample. Note that the aqua regia may not be enough to fully dissolve recalcitrant phases such as Alumina or C: it allowed a strong acidic leaching of the catalyst from its support phase. Catalyst loading determined by ICP/MS should be considered therefore as the amount of catalyst available using aqua regia rather than the total metallic loading. Nevertheless, with an exception for Rh/C where an incomplete digestion was observed, all other catalyst loadings determined by ICP/MS were close to the value specified by the commercial supplier.

Table S2: Rh-based catalysts features (Nanoparticles size, metal dispersion, Pores volume, Pores diameter, and surface area) As Given by TEM, H<sub>2</sub> chemisorption, and N<sub>2</sub> Adsorption/Desorption

|                                   | <b>Rh/C</b> | <b>Rh/Alumina</b> |
|-----------------------------------|-------------|-------------------|
| Particles size (nm)               | 0.93        | 0.76              |
| Metal dispersion (%)              | 23.4        | 24.0              |
| Pores volume (cm <sup>3</sup> /g) | 07          | 0.4               |
| Pores diameter (Å)                | 10,8        | 74.5              |
| Surface area (m <sup>2</sup> /g)  | 815         | 150               |

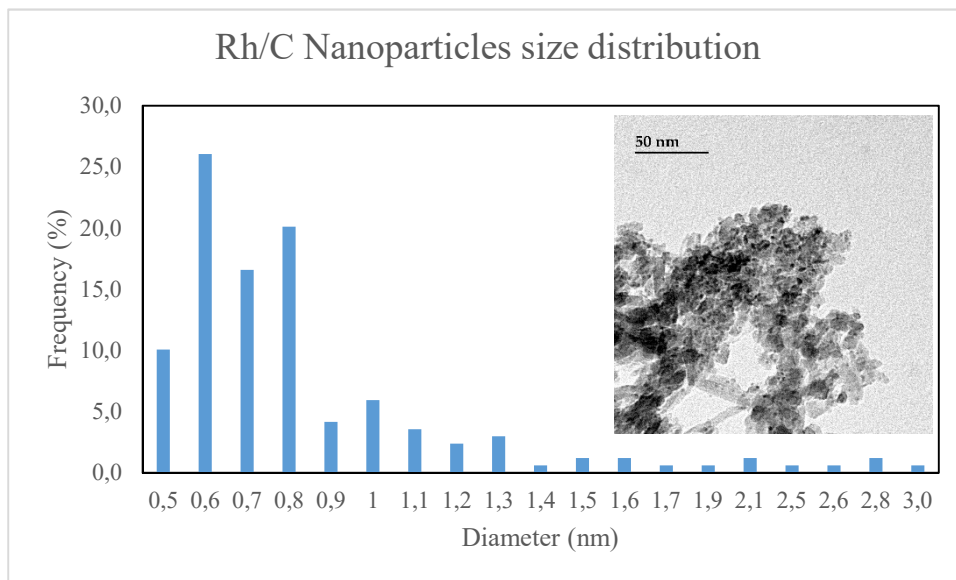

Figure 1S: Rh/C Particles size distribution measured by TEM

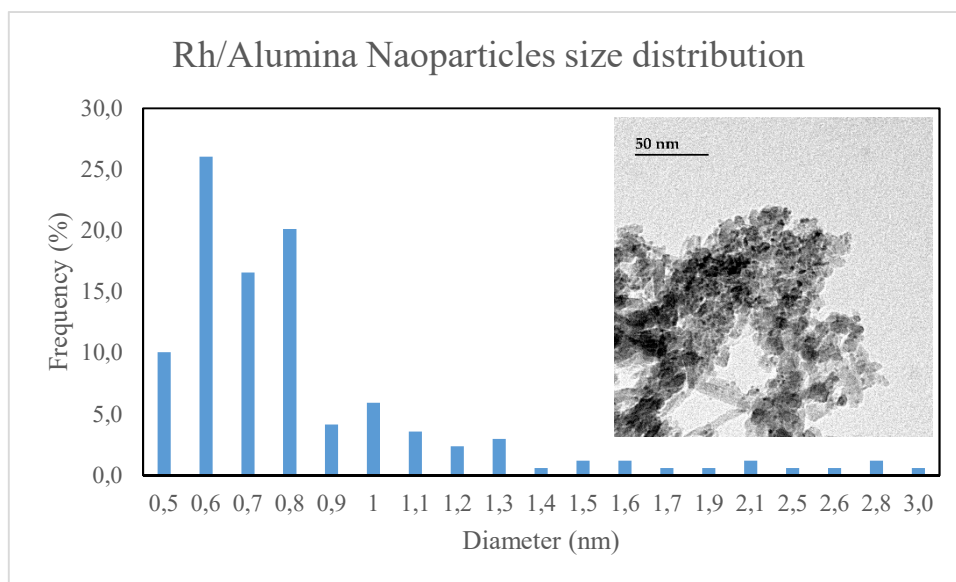

Figure 2S: Rh/Alumina Particles size distribution measured by TEM
